# COVID-19 peak estimation and effect of nationwide lockdown in India

Belfin R V<sup>1\*</sup>, Piotr Bródka<sup>2</sup>, Radhakrishnan B L<sup>1</sup>, Rejula V<sup>1</sup>

<sup>1</sup>Department of Computer Science and Engineering, School of Engineering and Technology, Karunya Institute of Technology and Sciences, Coimbatore, India.

<sup>2</sup>Department of Computational Intelligence, Wrocław University of Science and Technology, Wrocław, Poland.

\* Corresponding author

EmailID : researchbelfin@gmail.com

## Abstract:

There was a fury of the pandemic because of novel coronavirus (2019-nCoV/SARS-CoV-2) that happened in Wuhan, Hubei province, in China in December 2019. Since then, many model predictions on the COVID-19 pandemic in Wuhan and other parts of China have been reported. The first incident of coronavirus disease 2019 (COVID-19) in India was reported on 30 January 2020, which was a student from Wuhan. The number of reported cases has started to increase day by day after 30 February 2020. The purpose of this investigation is to provide a prediction of the epidemic peak for COVID-19 in India by utilizing real-time data from 30 February to 14 April 2020. We apply the well-known epidemic compartmental model "SEIR" to predict the epidemic peak of COVID-19, India. Since we do not have the complete detail of the infective population, using the available infected population data, we identify the  $R_0$  by using polynomial regression. By using the third-order polynomial equation, we estimate that the basic reproduction number for the epidemic in India is  $R_0 = 3.3$  (95%CI, 3.1–3.5), and the epidemic peak could be reached by September 2020.

**Keywords:** COVID-19; SEIR compartmental model; basic reproduction number, computational network science

31 **1. Introduction**

32 During December 2019, a new virus named CORONA (1), later renamed COVID-19, devised an  
33 outbreak in Wuhan, a city in the Hubei region, China. Subsequently, COVID-19 started to spread  
34 to the other parts of China and many other countries around the globe. By the end of January  
35 2020, there was a global COVID-19 positive case of 9,776 individuals, and the number of death  
36 casualties crossed 213. The WHO announced it as a worldwide public health crisis (2). COVID-  
37 19 worldwide death causalities rose to 811 by 9th February and surpassed the total death  
38 casualties of the SARS epidemic during 2003. Afterward, the number of COVID-19 positive  
39 cases started to grow at a rapid pace(3). As China and other COVID-19 affected nations reacted  
40 quickly to this pandemic, it is crucial to understand the severity, the total number of infected  
41 people, COVID confirmed cases, total death, basic reproduction number, and other significant  
42 determinants related to this deadly pandemic. Before-mentioned information may help the health  
43 care administrators in the respected regions and the city health care executives to make bold and  
44 informed choices (4).

45 As of 5th May, globally, COVID affected cases rose to 3,646,225, and the death toll rose to  
46 252,941 individuals; meanwhile, on a positive note, recovered count increased to 1,206,276  
47 people (5). Countries such as the USA, Spain, Italy, Germany, and the United Kingdom have the  
48 highest number of COVID-19 cases, respectively(6). COVID-19 has spread to 210 countries and  
49 territories around the globe, and two international conveyances named Diamond Princess cruise  
50 ship harbored in Yokohama, Japan, and Holland America's MS Zaandam cruise ship(7).

51 In India, as of 29th April 2020, according to the official website of India, COVID-19 affected  
52 22629 people, recovered 7695 people, and a death toll of 1007 individuals, respectively (8).  
53 India reported its first case (9) on 30th January 2020 in a coastal state named Kerala in the  
54 southern part of India, which was a student who traveled from Wuhan, China. Subsequently, the  
55 COVID-19 positive cases started growing day by day because of many other travelers and  
56 tourists arrived through airways (10). The detail of the week by week increase in COVID-19  
57 cases has been given in table 1.

58 **Table 1 COVID-19 weekly reported and accumulated cases in India**

| <b>Week</b>               | <b>Number of Newly Reported Cases</b> | <b>Number of Accumulated Cases</b> |
|---------------------------|---------------------------------------|------------------------------------|
| 30 January – 1 February   | 1                                     | 1                                  |
| 2 February – 8 February   | 2                                     | 3                                  |
| 9 February – 15 February  | 0                                     | 3                                  |
| 16 February – 22 February | 0                                     | 3                                  |
| 23 February – 29 February | 0                                     | 3                                  |
| 1 March – 7 March         | 31                                    | 34                                 |
| 8 March – 14 March        | 48                                    | 82                                 |
| 15 March – 21 March       | 332                                   | 414                                |
| 22 March – 28 March       | 987                                   | 1,401                              |

|                     |        |        |
|---------------------|--------|--------|
| 29 March – 4 April  | 3,588  | 4,989  |
| 5 April – 11 April  | 8,446  | 13,435 |
| 12 April – 18 April | 16,365 | 29,880 |
| 19 April – 27 April | 29,451 | 59,251 |

59

60 According to the number of cases in table 1, there is a significant spread of COVID-19 that  
61 happened in India. The most significant concern of the Indian public is the duration of the  
62 pandemic that is extending at the time of poorly shaped economy. (Mathew, 2019; Pesek, 2020).  
63 The purpose of the study is to predict the pandemic peak in India and assists the public and the  
64 government in taking predictive measures to keep the safeguard Indian people in this worst  
65 pandemic situation.

66 The numbers presented in table 1 have uncertainty between reported cases and accumulated  
67 cases. The reported cases have grown exponentially since the affected person may spread the  
68 infection to its fellow beings (4,13,14). The accumulated COVID-19 cases are high because of  
69 the unavailability of drugs to treat the disease and an insufficient number of test kits to detect it  
70 (15). Recently India procured some rapid COVID-19 test kits from China, and most of the kits  
71 showed inaccurate results (16). This study takes this uncertainty in the infected and the  
72 accumulated population count and applies a mathematical model for prediction. More  
73 specifically, the study assumes that diagnostics can identify only  $p(0 < p \leq 1)$  fraction of infected  
74 Indian citizens. The value  $p$  is the probability of an infected Indian from the whole population.  
75 Also, For Analysis, we have assumed the first date of infection in India as of March 1, 2020,  
76 because after January 30<sup>th</sup> and February 1<sup>st</sup> there were no COVID-19 infected cases reported in  
77 India till February 30<sup>th</sup>.

## 78 2. Related Work

79 Wilder-Smith (3) modeled the COVID-19 outbreak of Diamond Princess ship using the SEIR  
80 model. After calibrating the model with transient functions, the results show that population  
81 density creates high risk. The contact rate and  $R_0$  are dependent on the density of the population.  
82 Containment measures reduced the initial  $R_0$  14.8 to 1.78. Kuniya (17) predicts the COVID-19  
83 peak of Japan using the SEIR model. Infection rate  $\beta$  was estimated by using the best fit  
84 procedure least square with poisson noise. The results show that  $R_0 = 2.6$  (95%CI, 2.4–2.8).  
85 Interventions delay the epidemic peak delayed the peak from 179 days to 243; it reduces the size  
86 of the epidemic. Ranjan (18) estimated the peak prediction of India using the SIR model. The  
87 results show the  $R_0 = 1.4-3.9$ . Early lockdown in India aid in reducing the spread of COVID-19  
88 to a considerable number. Prem (19) studied the effect of countermeasures in China using the  
89 SEIR model. The authors made a contact matric for distinct intervention scenarios to study the  
90 impact of social distancing. The results show that social distancing was a valid measure, and  
91 early removal of social restrictions would create another peak. Wang (20) estimated the epidemic  
92 trend in China using the SEIR model. The results show that  $R_0$  was 1.9, 2.6, and 3.1 before

93 implementing any countermeasures. After applying the countermeasures in phases,  
94 simultaneously,  $R_0$  also reduced in each phase ranging from 3.1 to 0.5.

95 Based on the review of different prediction models, we realized that the interventions are useful  
96 to delay the outburst while predicting the influencing variables should be incorporated to get  
97 a better result. However, prediction techniques assist the countries in formulating a better  
98 containment plan. The containment plan may differ based on the preparedness status of each  
99 country and the response plan (4).

100

### 101 3. Methods

102 In this section, we present the basic concepts of the SEIR compartmental epidemic model,  
103 the basic concepts related to the SEIR model, and definitions that we have used.

#### 104 3.1. Model

105 This study applies the well-known SEIR epidemic model for prediction. The state diagram of the  
106 Susceptible-Exposed-Infected-Removed model depicted in Fig 1. SEIR will be an appropriate  
107 model for predicting COVID-19 because it has a considerable post-infection incubation period in  
108 which the exposed person is not infectious.

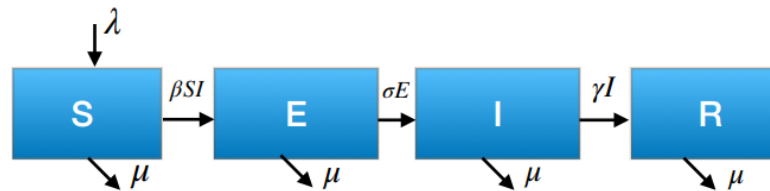

109

110

Fig 1: State Diagram for the SEIR epidemic model

111

112 In Fig 1, the notations S, E, I, R denotes the compartments in the model named Susceptible,  
113 Exposed, Infected, and Removed, respectively.  $\beta$  is the effective transmission rate,  $\lambda$  is the  
114 “birth” rate of susceptible population,  $\mu$  is the mortality rate,  $\sigma$  is the onset rate from latent to  
115 infected and  $\gamma$  is the removal rate (recovery or death). For this prediction, the birth rate  $\lambda$  and the  
116 mortality rate  $\mu$  are insignificant; hence we define the SEIR model with our new birth and  
117 mortality in the eq (1).

118

119

$$\begin{cases} S'(t_s) = -\beta S(t_s)I(t_s) \\ E'(t_s) = \beta S(t_s)I(t_s) - \sigma E(t_s) \\ I'(t_s) = \sigma E(t_s) - \gamma I(t_s) \\ R'(t_s) = \gamma I(t_s) \\ t_s > 0 \end{cases} \quad (1)$$

120 In equation (1),  $S(t_s)$ ,  $E(t_s)$ ,  $I(t_s)$ ,  $R(t_s)$  denotes the Susceptible, Exposed, Infectious and  
 121 Recovered population in time slice  $t_s$ , respectively. Similarly,  $1/\sigma$ ,  $1/\gamma$  is the mean incubation  
 122 period and mean transmittable period, respectively. This study assumes the per unit time as one  
 123 day.

124

**Table 2 Estimations of various parameters for epidemic models from previous research**

| Reference | Location            | Basic<br>Reproduction<br>Number $R_0$ | Incubation<br>Period | Infectious<br>period |
|-----------|---------------------|---------------------------------------|----------------------|----------------------|
| (21)      | Wuhan               | 3.0(1.5-4.5)                          | 5.2                  | 2.9                  |
| (22)      | Wuhan               | 2.2 (1.4 - 3.9)                       | 5.2 (4.1 - 7.0)      | 2.3 (0.0 - 14.9)     |
| (21)      | Greater<br>Wuhan    | 2.68 (2.47 - 2.86)                    | 6.1                  | 2.3                  |
| (23)      | Hubei               | 1.95 (1.4 - 2.5)                      |                      |                      |
| (24)      | Hubei               | 2.25 (2.0 - 2.5)                      | 5.5 (5.0 - 6.0)      |                      |
| (25)      | Guangdong           | 4.5 (4.4 - 4.6)                       | 4.8 (2.2 - 7.4)      | 2.9(0 - 5.9)         |
| (26)      | Princess<br>Diamond | 14.8                                  | 5.0                  | 10.0                 |
| (27)      | Wuhan               |                                       | 6.5 (5.6 - 7.9)      |                      |
| (28)      | Wuhan               | 3.11 (2.39 - 4.13)                    |                      |                      |
| (29)      | Shenzhen            |                                       | 4.8 (4.2 - 5.4)      | 1.5(0-3.4)           |
| (30)      | China               | 6.47 (5.71 - 7.23)                    |                      |                      |
| (17)      | Japan               | 2.6(2.4 - 2.8)                        | 5                    |                      |
| (18)      | India               | 2.65(1.4-3.9)                         | 5-6                  |                      |

125

126 By using the numbers from the previous studies given in Table 2, the mean incubation  $1/\sigma$  has  
 127 been fixed as  $1/\sigma = 5$ ; thus,  $\sigma = 0.2$  and recovery rate  $\gamma = 0.1$ , respectively. Also,  $S + E + I + R$   
 128 has been fixed to be one so that ultimately each population will be equated with the proportion to  
 129 the total population.

130 Considering the population in India, the study assumes that one infective individual identified at  
 131 time slice  $t=0$  among total  $N=1,350,000,000$  number of people in India (31). This implies  $\gamma(0)$   
 132  $= pI(0) N = 1$ , Where

133  
134

$$\gamma(t_s) = pI(t) N,$$

135 denoted the number of infectious individuals identified at time slice  $t_s$ . Thus, we obtain  
136  $I(0) = 1/(pN)$ . The study assumes that there are no exposed and removed people during the time  
137 slice  $t_s=0$ , which implies  $E(0) = R(0) = 0$ , and hence,

138  
139

$$S(0) = E(0) - I(0) - R(0) = 1 - \frac{1}{pN}.$$

140 Based on the previous works (17), we assume the  $p$ -value ranges from 0.01 to 0.1. The basic  
141 reproduction number  $R_0$  denotes the secondary spread made by one infected individual(32), is  
142 calculated as the maximum eigenvalue of the next generation matrix  $FV^{-1}$  (33,34), where

143

$$F = \begin{bmatrix} 0 & \beta S(0) \\ 0 & 0 \end{bmatrix}, V = \begin{bmatrix} \sigma & 0 \\ -\sigma & \gamma \end{bmatrix}$$

144 Therefore we obtain,

$$R_0 = \frac{\beta S(0)}{\gamma} = \frac{\beta}{\gamma} \left(1 - \frac{1}{pN}\right) \quad (2)$$

### 145 146 **3.2. The sensitivity of the Basic Reproduction Number**

147 The basic reproduction number  $R_0$  is independent of the onset rate  $\sigma$ . The sensitivity of  $R_0$  to  
148 other parameters  $\beta, \gamma, p$  are calculated as:

149

$$A_\beta = \frac{\beta}{R_0} \frac{\partial R_0}{\partial \beta} = 1, A_\gamma = \frac{\gamma}{R_0} \frac{\partial R_0}{\partial \gamma} = -1, A_p = \frac{p}{R_0} \frac{\partial R_0}{\partial p} = \frac{1}{pN - 1} \quad (3)$$

150 Where,  $A_\beta, A_\gamma, A_p$  denotes the normalized sensitive indexes for  $\beta, \gamma, p$ , respectively. As we note  
151 from the equation (3) that the  $k$  time's increase in  $\beta$  (respectively  $\gamma$ ) results in the  $k$  (respectively  
152  $k^{-1}$ ) time's increase in  $R_0$ . Most important, we note from equation (3) that  $A_p \approx 0$  if  $p \geq 1.0 \times 10^{-7}$ .  
153 This implies that the identification rate  $p$  in a realistic range almost does not affect the size of  $R_0$ .

### 154 **3.3. Estimation of the infection rate.**

155 Let  $y(t_s), t_s = 0, 1, \dots, 45$  be the number of daily reported cases of COVID-19 cases in India from  
156 1<sup>st</sup> March ( $t_s = 0$ ) to 14<sup>th</sup> April 2020 ( $t_s = 45$ ). We perform a polynomial regression to predict the  
157 infection rate  $\beta$  of COVID-19 in India.

### 158 **Description 1.**

159 Polynomial Regression is a regression algorithm that generations the relationship within  
 160 a dependent (y) and independent variable (x) as n<sup>th</sup> degree polynomial. The Polynomial  
 161 Regression equation is given below:

162 As given in the equation, in Polynomial regression, the standard features of the variables are  
 163 transformed into the Polynomial features of necessary degree (2, 3, ..., n) and then modeled by a  
 164 linear model." As we see in Fig 2, the data points are not linear, so we need to use a non-linear  
 165 method to predict this rate of infection  $\beta$ .

166 Thus we obtain  $\beta$  estimated as 0.33 (95% CI, 0.31-0.35). The polynomial regression fit has been  
 167 given in Fig 2. Then, we obtain the value or  $R_0$  from the equation (2). We get an estimation of  $R_0$   
 168 as 3.3 (95%CI, 3.1-3.5). The values identified and used for the COVID India Peak prediction has  
 169 been given in Fig 2.

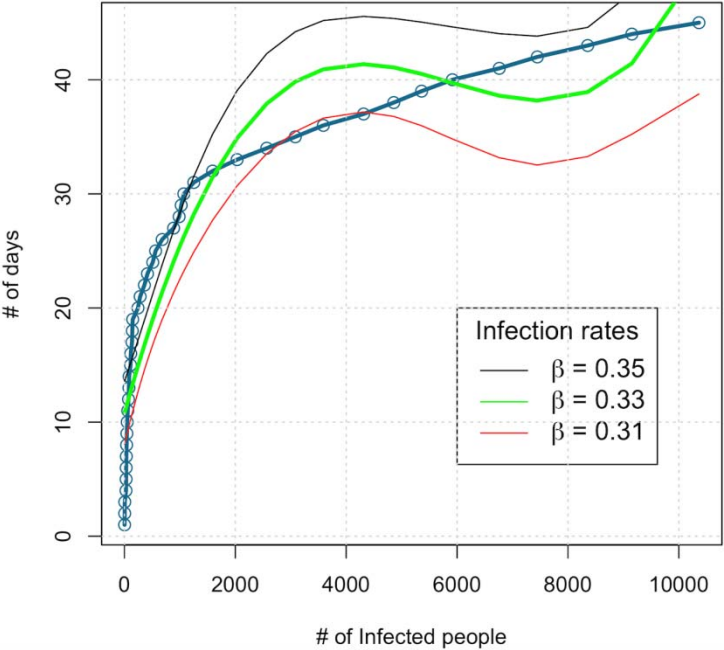

170  
 171 **Fig 2: The comparison of  $Y(t_s)$  with the estimated infection rate  $\beta$  and the number of daily reported**  
 172 **cases of COVID-19 in India from 1st March ( $t_s = 0$ ) to 14th April ( $t_s = 45$ )**

173 **Table 3: Parameter values for predicting COVID-19 India**

| Parameter | Description               | Value                  | Reference |
|-----------|---------------------------|------------------------|-----------|
| $\beta$   | Infection Rate            | 0.33(95%CI, 0.31-0.35) | Estimated |
| $R_0$     | Basic Reproduction Number | 3.3(95%CI, 3.1-3.5)    | Estimated |
| $\sigma$  | Onset Rate                | 0.2                    | (21)      |

|          |                           |                    |      |
|----------|---------------------------|--------------------|------|
| $\gamma$ | Removal Rate              | 0.1                | (35) |
| $N$      | Total population in India | $1.35 \times 10^9$ | (31) |
| $p$      | Identification rate       | 0.01 -0.1          | (17) |

174

175 **4. Results**

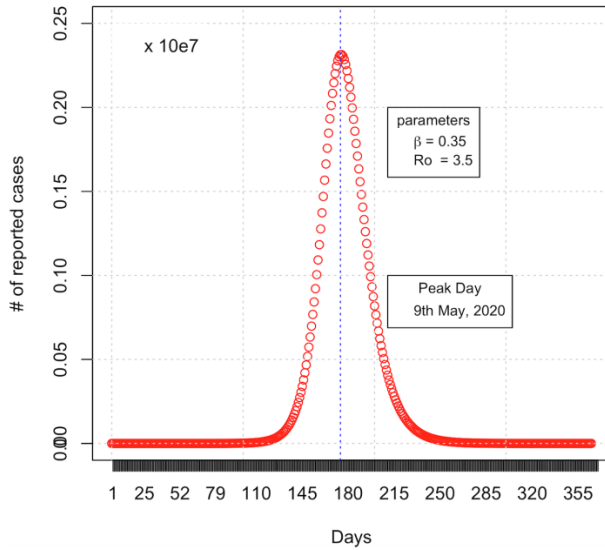

(a)  $\beta = 0.35$  ( $t_s^* = 174$ )

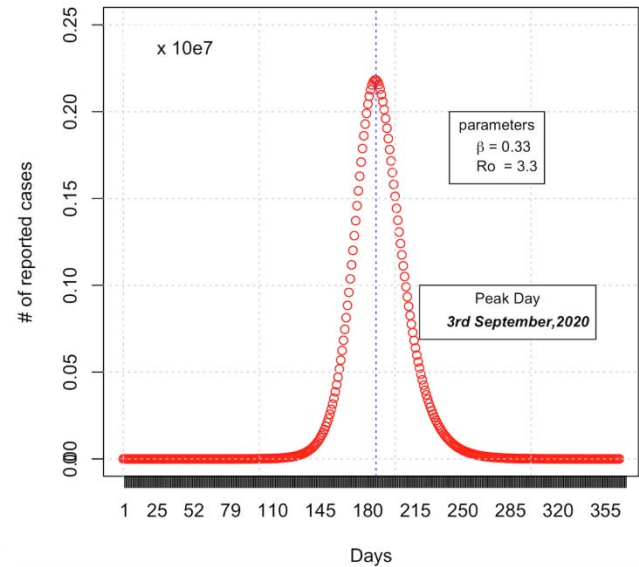

(b)  $\beta = 0.33$  ( $t_s^* = 186$ )

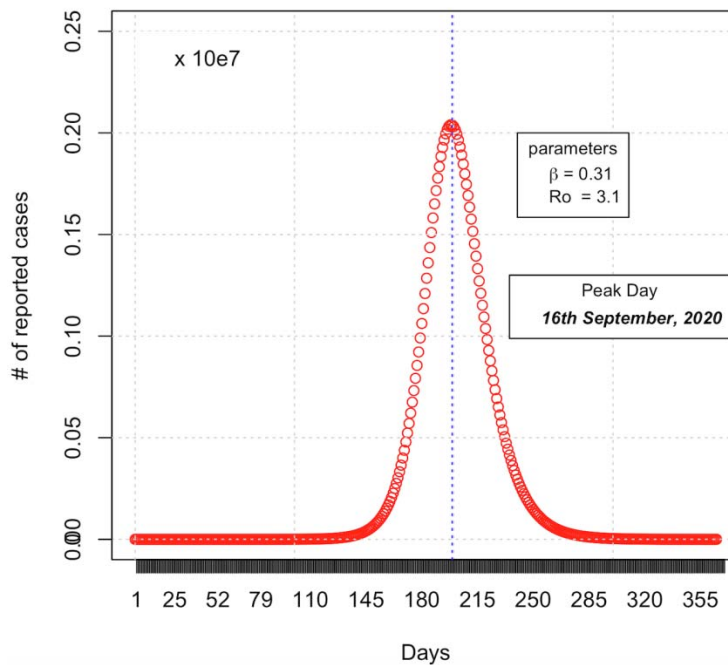

(c)  $\beta = 0.31$  ( $t_s^* = 199$ )

176

177

**Fig 2.** Time variation of the number  $Y(t)$  of the infective individuals who are identified at the time slice  $t_s$  ( $0 < t_s < 365$ ) for  $p=0.1$ . The dotted lines represent the epidemic peak  $t_s^*$ .



178 This work defines the pandemic peak  $t_s^*$  by the time  $Y$  attains its maximum in 1 year, that is  
 179  $Y(t_s^*) = \max_{0 \leq t_s \leq 365} Y(t_s)$ . Firstly, we set the identification probability  $p = 0.1$ . In this case, we  
 180 estimate the following predictions on the long time behavior of  $Y(t)$  for  $\beta = 0.35, 0.33$ , and  $0.31$ .

181 We see from the estimated epidemic peak is  $t_s^* = 186$ (95% CI, 174- 199). That is, starting from  
 182 1<sup>st</sup> March 2020 ( $t_s = 0$ ), the estimated epidemic peak is 3<sup>rd</sup> October 2020 ( $t_s = 186$ ), and the  
 183 uncertainty range is from 22<sup>nd</sup> August 2020 ( $t_s = 174$ ) to 16<sup>th</sup> September 2020( $t_s = 199$ ).

184 **4.1. The possible effect of interventions**

185 Interventions such as lockdown, quarantine, face masks, gloves reduce the number of cases  
 186 reported more significantly. These measures can reduce the infection rate and will possibly delay  
 187 the epidemic peak for approximately one month.

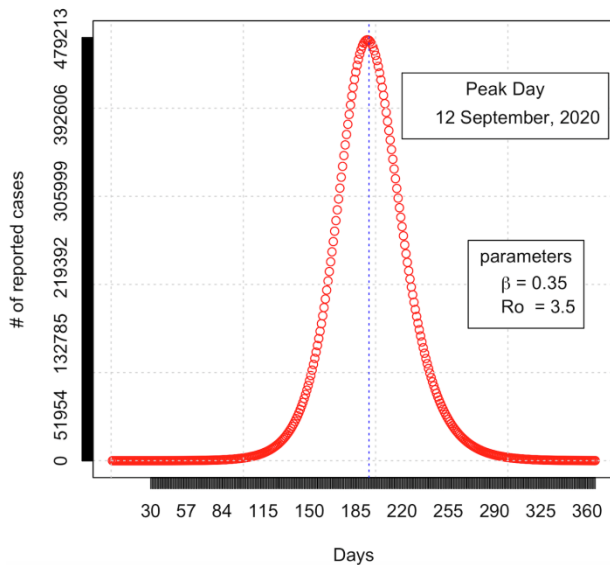

(a)  $\beta = 0.35$  ( $t_s^* = 195$ )

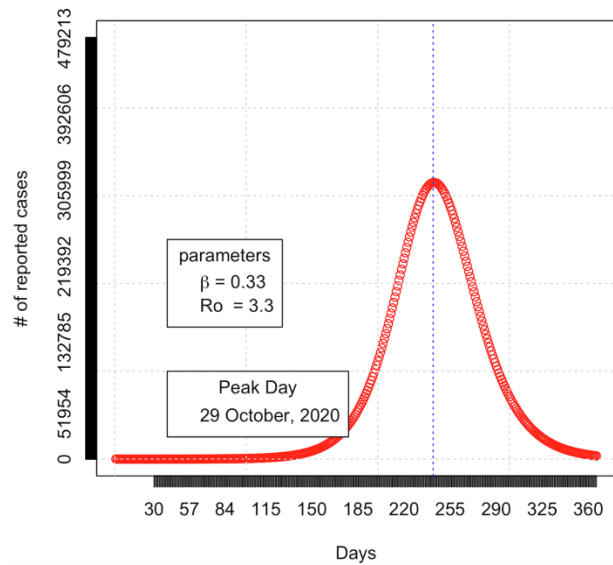

(b)  $\beta = 0.33$  ( $t_s^* = 242$ )

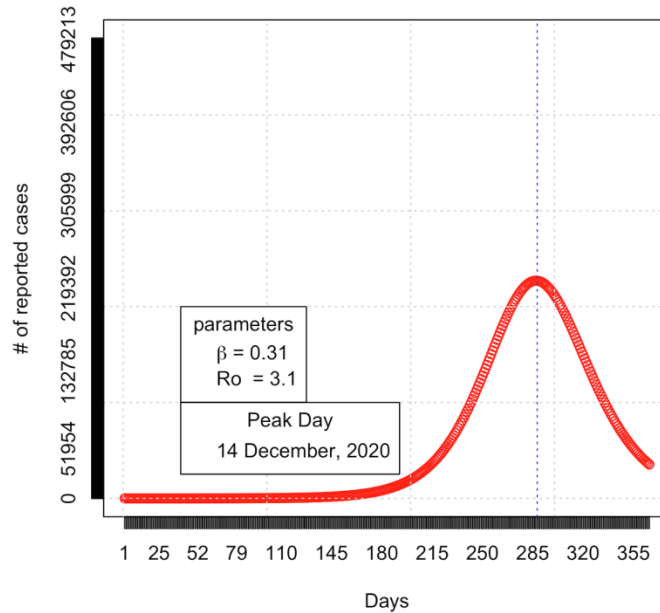

(c)  $\beta = 0.31$  ( $t_s^* = 288$ )

188 **Fig 3 Time variation of the number  $Y(t_s)$  of the infective individuals who are identified at the time slice  $t_s$  ( $0 <$   
 189  $t_s < 365$ ) for after 40 days of lockdown. The dotted lines represent the epidemic peak  $t_s^*$ .**

190 We have estimated the COVID-19 spread for a 40 days lockdown in India from (24<sup>th</sup> March to  
 191 3<sup>rd</sup> May) (36). We obtain the result given in Fig 3 as a result, when using the SEIR model for the  
 192 identified parameters in Table 2. The estimated epidemic peak has been in the time slice  $t_s^* =$   
 193 242(95%CI, 195-288). The calculation has been made from the 1<sup>st</sup> March ( $t_s = 0$ ), the estimated  
 194 peak is 29<sup>th</sup> October 2020( $t_s^* = 242$ ), and the uncertainty peak day ranges from 12<sup>th</sup>  
 195 September( $t_s^* = 195$ ) to 14<sup>th</sup> December( $t_s^* = 288$ ).

196 After analyzing the SEIR model prediction, India's planned lockdown period 40 days has been  
 197 introduced to the model. The rate of spread has been reduced for those 40 days. Fig 4 clearly  
 198 shows that the intervention has a positive effect on the delay of the epidemic peak. This delay in  
 199 the epidemic peak can help in the improvement in the medical environment and research to treat  
 200 the patients well. Fig 3 and Fig 4 show that there is a small change for a minimal period  $t_s \leq$   
 201 130. Therefore the interventions like government restrictions for vehicle movement and  
 202 lockdown should be extended to reduce the final epidemic size.

203

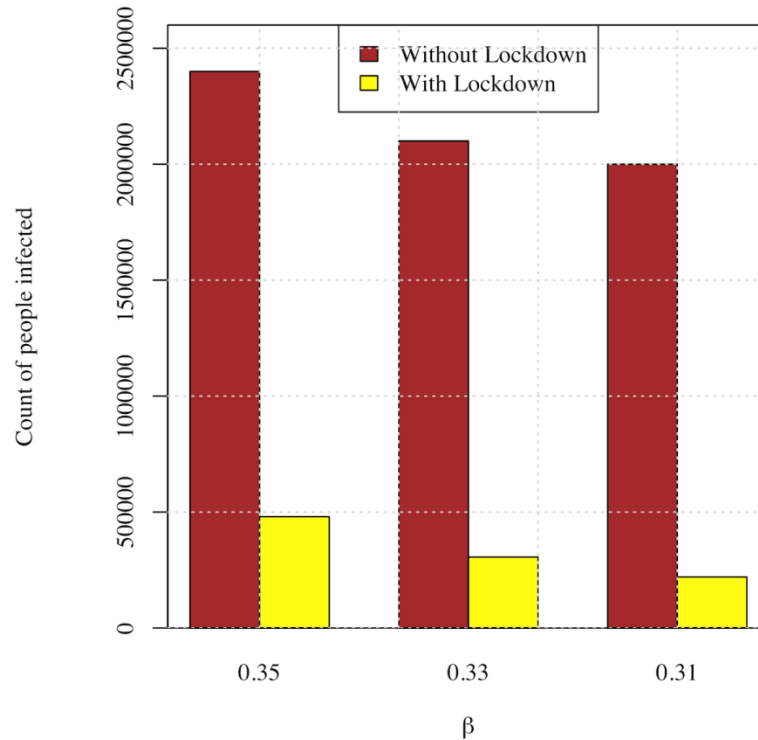

204

205

**Fig 5: Comparison of the number of predicted infected cases without and with lockdown**

206

207

208

209

210

211

212

213

214

The comparison of the predicted infected patients with and without lockdown has been depicted in Fig 5. It shows clearly that the lockdown has created a positive effect in reducing the risk of COVID-19 infection. Flattening the curve will reduce the overload in the health care system of India. India's healthcare facilities are not sufficient (37) to handle any massive outbreak when considering the population size and very small doctors per 1000 citizens ratio; hence the country needs to depend on alternative strategies. Flattening the infection curve should also help to reduce the death rate in the country. From the history of Spanish flu during 1918 it is clearly evident that lifting the lockdown early may create the next peaks which may cause even more deaths than the first wave (38).

215

## 5. Discussion

216

217

218

219

220

221

222

223

224

As of May 5, 2020, the total number of COVID-19 infected and the death toll rose to 32,138 and 1,568, respectively. An increase in active cases is an alarming situation because, as discussed earlier, India is one of the largest population powerhouses in the whole world. Also, India's healthcare infrastructure is weak when we compare it with the WHO guidelines and one of the the worst doctor-people ratio (i.e., 1:11,082) in the world (The Financial Express, 2018). India will enter into STAGE III (40) of spreading if we do not correctly predict and implement the right methodologies to stop the spreading. In the present scenario, there is no proper vaccine or drugs for this deadly pandemic. Mathematical modeling like this research can help us predict the intensity of this pandemic and can effectively fix it with necessary measures. During this study,

225 the major challenge was with the data. The data was not linear, and it showed an exponential  
226 growth concerning the infected cases in India. Over fitting has been another significant problem  
227 with a number of infected time series data.

228 In this study, we applied the SEIR compartmental model to the COVID-19 daily reported cases  
229 in India from March 1<sup>st</sup>, 2020, to April 14<sup>th</sup>, 2020. We have estimated the transmission rate  $\beta$  as  
230 0.33(95%CI, 0.31-0.35) and the  $R_0$  the basic reproduction number as 3.3(95%CI, 3.1-3.5) and  
231 predicted the epidemic peak would be reached possibly in the September. Our prediction shows  
232 that India would have reached 2,400,000 infected people by the end of May 2020 if the  
233 lockdown was not pronounced. Since the government announced lockdown, India should expect  
234 the epidemic peak by September 2020 with lower number of cases which will be approximately  
235 around 450,000.

236 Our research also makes it clear that the epidemic COVID-19 in India is not going to end  
237 quickly. The estimated values of the  $R_0$  in this work is not different from the other papers  
238 (table 2). Finally, we provide a suggestion for the Indian Govt. and Policymakers to take the  
239 following steps:

- 240 • the intervention, like lockdown and other measures by the government, has a positive  
241 effect on delaying the epidemic peak, which will improve the medical environment  
242 and give many research results before the peak;
- 243 • intervention over a relatively long period is required to reduce the size of COVID-19  
244 pandemic effectively;
- 245 • India needs to increase the number of tests to find the percentage of infected cases in  
246 different states and regions.

247 For this research, we have assumed the same transmission probability, removal rate, and the  
248 onset value throughout this work. These rates may increase or decrease when days passed by  
249 according to the intensity of the pandemic. The real-time change in daily data may change the  
250 predictions accordingly. According to some Indian researches, many other factors, such as  
251 "immune power in gene because of environment, and food habits," can help India to flatten the  
252 infection curve (41,42).

253

## 254 **Acknowledgement**

255 This work was partially supported by Polish National Science Centre, decisions no.  
256 2016/21/D/ST6/02408 and Wrocław University of Science and Technology statutory funds.

257

## 258 **References**

- 259 1. WHO. Coronavirus disease 2019 [Internet]. 2020 [cited 2020 Apr 24]. Available from:  
260 <https://www.who.int/emergencies/diseases/novel-coronavirus-2019>
- 261 2. WHO. Advice for public [Internet]. 2020 [cited 2020 Apr 24]. Available from:  
262 <https://www.who.int/emergencies/diseases/novel-coronavirus-2019/advice-for-public>
- 263 3. Wilder-Smith A, Chiew CJ, Lee VJ. Can we contain the COVID-19 outbreak with the  
264 same measures as for SARS? *Lancet Infect Dis* [Internet]. 2020;3099(20). Available from:  
265 <http://www.ncbi.nlm.nih.gov/pubmed/32145768>
- 266 4. Kapoor A. “STOP Covid-19”: An Actionable Plan to Stop the Pandemic. SSRN. 2020;
- 267 5. Worldometers.info. Coronavirus Update (Live): 134,918 Cases and 4,989 Deaths from  
268 COVID-19 Virus Outbreak - Worldometer [Internet]. 2020 [cited 2020 Apr 2]. Available  
269 from: <https://www.worldometers.info/coronavirus/>
- 270 6. theguardian.com. Coronavirus world map: which countries have the most cases and  
271 deaths? | World news | The Guardian [Internet]. 2020 [cited 2020 Apr 25]. Available from:  
272 [https://www.theguardian.com/world/2020/apr/24/coronavirus-world-map-countries-most-](https://www.theguardian.com/world/2020/apr/24/coronavirus-world-map-countries-most-cases-and-deaths)  
273 [cases-and-deaths](https://www.theguardian.com/world/2020/apr/24/coronavirus-world-map-countries-most-cases-and-deaths)
- 274 7. Worldometer. Coronavirus Cases [Internet]. Worldometer. 2020 [cited 2020 Apr 2]. p. 1–  
275 22. Available from: [https://www.worldometers.info/coronavirus/coronavirus-cases/#daily-](https://www.worldometers.info/coronavirus/coronavirus-cases/#daily-cases)  
276 [cases](https://www.worldometers.info/coronavirus/coronavirus-cases/#daily-cases)
- 277 8. MyGov.in. #IndiaFightsCorona COVID-19 | MyGov.in [Internet]. 2020 [cited 2020 Apr  
278 24]. Available from: <https://www.mygov.in/covid-19>
- 279 9. Unnithan PSG. Kerala reports first confirmed coronavirus case in India. *India Today*  
280 [Internet]. 2020 [cited 2020 Apr 29]; Available from:  
281 [https://www.indiatoday.in/india/story/kerala-reports-first-confirmed-novel-coronavirus-](https://www.indiatoday.in/india/story/kerala-reports-first-confirmed-novel-coronavirus-case-in-india-1641593-2020-01-30)  
282 [case-in-india-1641593-2020-01-30](https://www.indiatoday.in/india/story/kerala-reports-first-confirmed-novel-coronavirus-case-in-india-1641593-2020-01-30)
- 283 10. TheEconomicTimes. coronavirus: 15 lakh air travellers entered India in 2 months: Cabinet  
284 Secretary - The Economic Times [Internet]. The Economic Times. 2020 [cited 2020 Apr  
285 29]. Available from: [https://economictimes.indiatimes.com/news/politics-and-nation/15-](https://economictimes.indiatimes.com/news/politics-and-nation/15-lakh-air-travellers-entered-india-in-2-months-cabinet-secretary/articleshow/74849839.cms?from=mdr)  
286 [lakh-air-travellers-entered-india-in-2-months-cabinet-](https://economictimes.indiatimes.com/news/politics-and-nation/15-lakh-air-travellers-entered-india-in-2-months-cabinet-secretary/articleshow/74849839.cms?from=mdr)  
287 [secretary/articleshow/74849839.cms?from=mdr](https://economictimes.indiatimes.com/news/politics-and-nation/15-lakh-air-travellers-entered-india-in-2-months-cabinet-secretary/articleshow/74849839.cms?from=mdr)
- 288 11. Pesek W. India Has Worst Economy In 42 Years. Is Prime Minister Modi Watching?  
289 *Forbes.com* [Internet]. 2020 [cited 2020 Apr 24]; Available from:  
290 [https://www.forbes.com/sites/williampesek/2020/01/10/india-has-worst-economy-in-42-](https://www.forbes.com/sites/williampesek/2020/01/10/india-has-worst-economy-in-42-years-is-prime-minister-modi-watching/#490e5aff2a11)  
291 [years-is-prime-minister-modi-watching/#490e5aff2a11](https://www.forbes.com/sites/williampesek/2020/01/10/india-has-worst-economy-in-42-years-is-prime-minister-modi-watching/#490e5aff2a11)
- 292 12. Mathew AB& P. India’s GDP growth falls below 5% — Quartz India. *Quartz India*  
293 [Internet]. 2019 [cited 2020 Apr 24]; Available from: [https://qz.com/india/1758454/indias-](https://qz.com/india/1758454/indias-gdp-falls-below-5-percent/)  
294 [gdp-falls-below-5-percent/](https://qz.com/india/1758454/indias-gdp-falls-below-5-percent/)
- 295 13. Wu D, Wu T, Liu Q, Yang Z. The SARS-CoV-2 outbreak: what we know. *Int J Infect Dis.*  
296 2020;

- 297 14. Zheng Z, Huyan Y, Li H, Sun S, Xu Y. A lysosome-targetable near infrared fluorescent  
298 probe for glutathione sensing and live-cell imaging. *Sensors Actuators, B Chem* [Internet].  
299 2019;301:127065. Available from: <https://doi.org/10.1016/j.snb.2019.127065>
- 300 15. Times Of India. Why Covid-19 testing has been slow to take off - Times of India  
301 [Internet]. Times of India. 2020 [cited 2020 Apr 24]. Available from:  
302 [https://timesofindia.indiatimes.com/india/why-covid-19-testing-has-been-slow-to-take-](https://timesofindia.indiatimes.com/india/why-covid-19-testing-has-been-slow-to-take-off/articleshow/74859149.cms)  
303 [off/articleshow/74859149.cms](https://timesofindia.indiatimes.com/india/why-covid-19-testing-has-been-slow-to-take-off/articleshow/74859149.cms)
- 304 16. TheEconomicTimes. covid rapid testing kit: ICMR directs states not to use COVID-19  
305 rapid test kits for 2 days - The Economic Times [Internet]. The Economic Times. 2020  
306 [cited 2020 Apr 24]. Available from:  
307 [https://economictimes.indiatimes.com/industry/healthcare/biotech/healthcare/icmr-directs-](https://economictimes.indiatimes.com/industry/healthcare/biotech/healthcare/icmr-directs-states-not-to-use-covid-19-rapid-test-kits-for-2-days/articleshow/75271695.cms?from=mdr)  
308 [states-not-to-use-covid-19-rapid-test-kits-for-2-](https://economictimes.indiatimes.com/industry/healthcare/biotech/healthcare/icmr-directs-states-not-to-use-covid-19-rapid-test-kits-for-2-days/articleshow/75271695.cms?from=mdr)  
309 [days/articleshow/75271695.cms?from=mdr](https://economictimes.indiatimes.com/industry/healthcare/biotech/healthcare/icmr-directs-states-not-to-use-covid-19-rapid-test-kits-for-2-days/articleshow/75271695.cms?from=mdr)
- 310 17. Kuniya T. Prediction of the Epidemic Peak of Coronavirus Disease in Japan, 2020. *J Clin*  
311 *Med* [Internet]. 2020;9(3):1–7. Available from:  
312 <http://www.ncbi.nlm.nih.gov/pubmed/32183172>
- 313 18. Ranjan R. PREDICTIONS FOR COVID-19 OUTBREAK IN INDIA USING  
314 EPIDEMIOLOGICAL MODELS. 2020;
- 315 19. Prem K, Liu Y, Russell T, Kucharski AJ, Eggo RM, Davies N, et al. The effect of control  
316 strategies that reduce social mixing on outcomes of the COVID-19 epidemic in Wuhan,  
317 China. *medRxiv*. 2020;2667(20):2020.03.09.20033050.
- 318 20. Wang H, Wang Z, Dong Y, Chang R, Xu C, Yu X, et al. Phase-adjusted estimation of the  
319 number of Coronavirus Disease 2019 cases in Wuhan, China. *Cell Discov* [Internet].  
320 2020;6(1):4–11. Available from: <http://dx.doi.org/10.1038/s41421-020-0148-0>
- 321 21. Kucharski AJ, Russell TW, Diamond C, Liu Y, Edmunds J, Funk S, et al. Early dynamics  
322 of transmission and control of COVID-19: a mathematical modelling study. *Lancet Infect*  
323 *Dis*. 2020;
- 324 22. Wu JT, Leung K, Leung GM. Nowcasting and forecasting the potential domestic and  
325 international spread of the 2019-nCoV outbreak originating in Wuhan, China: a modelling  
326 study. *Lancet*. 2020;
- 327 23. WHO. Situation Report-7 [Internet]. 2020 [cited 2020 Apr 24]. Available from:  
328 <https://www.who.int/publications-detail/global-surveillance-for->
- 329 24. WHO. WHO-CHINA Joint Mission on CORONA Virus 2019 [Internet]. Report of the  
330 WHO-China Joint Mission on Coronavirus Disease 2019 (COVID-19). 2020 [cited 2020  
331 Apr 24]. Available from: [https://www.who.int/docs/default-source/coronaviruse/who-](https://www.who.int/docs/default-source/coronaviruse/who-china-joint-mission-on-covid-19-final-report.pdf)  
332 [china-joint-mission-on-covid-19-final-report.pdf](https://www.who.int/docs/default-source/coronaviruse/who-china-joint-mission-on-covid-19-final-report.pdf)
- 333 25. Liu T, Hu J, Kang M, Lin L, Zhong H, Xiao J, et al. Time-varying transmission dynamics  
334 of Novel Coronavirus Pneumonia in China. *bioRxiv* [Internet]. 2020;2020.01.25.919787.

- 335 Available from: <https://www.biorxiv.org/content/10.1101/2020.01.25.919787v1>
- 336 26. Rocklöv J, Sjödin H, Wilder-Smith A. COVID-19 outbreak on the Diamond Princess  
337 cruise ship: estimating the epidemic potential and effectiveness of public health  
338 countermeasures. *J Travel Med* [Internet]. 2020;3700. Available from:  
339 <http://www.ncbi.nlm.nih.gov/pubmed/32109273>
- 340 27. Backer JA, Klinkenberg D, Wallinga J. Incubation period of 2019 novel coronavirus  
341 (2019- nCoV) infections among travellers from Wuhan, China, 20 28 January 2020.  
342 *Eurosurveillance*. 2020.
- 343 28. Jonathan M Read, Jessica RE Bridgen, Derek AT Cummings, Antonia Ho, Chris P Jewell.  
344 Novel coronavirus 2019-nCoV: early estimation of epidemiological parameters and  
345 epidemic predictions. *MedRxiv* [Internet]. 2020;2020(January). Available from:  
346 <https://www.medrxiv.org/content/10.1101/2020.01.23.20018549v2.full.pdf+html>
- 347 29. Qifang B, Yongsheng W, Shujiang M, Chenfei Y, Xuan Z, Zhen Z, et al. Epidemiology  
348 and Transmission of COVID-19 in Shenzhen China: Analysis of 391 cases and 1,286 of  
349 their close contacts. *medRxiv*. 2020;
- 350 30. Tang B, Wang X, Li Q, Bragazzi NL, Tang S, Xiao Y, et al. Estimation of the  
351 Transmission Risk of the 2019-nCoV and Its Implication for Public Health Interventions.  
352 *J Clin Med*. 2020;
- 353 31. Worldometer. India Population (2020) [Internet]. Worldometer. 2020 [cited 2020 Apr 24].  
354 Available from: <https://www.worldometers.info/world-population/india-population/>
- 355 32. Mizumoto K, Chowell G. Transmission potential of the novel coronavirus (COVID-19)  
356 onboard the diamond Princess Cruises Ship, 2020. *Infect Dis Model*. 2020;
- 357 33. Diekmann O, Heesterbeek JAP, Roberts MG. The construction of next-generation  
358 matrices for compartmental epidemic models. *J R Soc Interface*. 2010;
- 359 34. Shi H, Han X, Jiang N, Cao Y, Alwalid O, Gu J, et al. Radiological findings from 81  
360 patients with COVID-19 pneumonia in Wuhan, China: a descriptive study. *Lancet Infect  
361 Dis* [Internet]. 2020;3099(20):1–10. Available from:  
362 <http://www.ncbi.nlm.nih.gov/pubmed/32105637>
- 363 35. Roda WC, Varughese MB, Han D, Li MY. Why is it difficult to accurately predict the  
364 COVID-19 epidemic? *Infect Dis Model* [Internet]. 2020;5:271–81. Available from:  
365 <http://www.sciencedirect.com/science/article/pii/S2468042720300075>
- 366 36. Alan Taylor. India Under Coronavirus Lockdown - The Atlantic [Internet]. The Atlantic.  
367 2020 [cited 2020 Apr 24]. Available from:  
368 [https://www.theatlantic.com/photo/2020/04/photos-india-under-coronavirus-  
369 lockdown/610444/](https://www.theatlantic.com/photo/2020/04/photos-india-under-coronavirus-lockdown/610444/)
- 370 37. Firstpost. Is India's health care system capable enough to deal with the novel coronavirus  
371 outbreak? - Firstpost [Internet]. Firstpost. 2020 [cited 2020 Apr 29]. Available from:  
372 <https://www.firstpost.com/health/indias-health-care-system-capable-enough-deal-novel->

- 373 coronavirus-outbreak-8138811.html
- 374 38. DailyMailOnline. San Francisco in the 1918 flu pandemic is a warning against lifting  
375 lockdown too soon | Daily Mail Online [Internet]. Daily Mail Online. 2020 [cited 2020  
376 Apr 29]. Available from: [https://www.dailymail.co.uk/news/article-8261013/San-](https://www.dailymail.co.uk/news/article-8261013/San-Francisco-1918-flu-pandemic-warning-against-lifting-lockdown-soon.html)  
377 [Francisco-1918-flu-pandemic-warning-against-lifting-lockdown-soon.html](https://www.dailymail.co.uk/news/article-8261013/San-Francisco-1918-flu-pandemic-warning-against-lifting-lockdown-soon.html)
- 378 39. The Financial Express. Doctor-population ratio: In India, one allopathic doctor for 11,082  
379 people, official data shows; Bihar, UP worst hit - The Financial Express [Internet]. The  
380 Financial Express. 2018 [cited 2019 Jan 15]. Available from:  
381 [https://www.financialexpress.com/india-news/doctor-population-ratio-in-india-one-](https://www.financialexpress.com/india-news/doctor-population-ratio-in-india-one-allopathic-doctor-for-11082-people-official-data-shows-bihar-up-worst-hit/1213243/)  
382 [allopathic-doctor-for-11082-people-official-data-shows-bihar-up-worst-hit/1213243/](https://www.financialexpress.com/india-news/doctor-population-ratio-in-india-one-allopathic-doctor-for-11082-people-official-data-shows-bihar-up-worst-hit/1213243/)
- 383 40. Sardar T, Nadim SS, Chattopadhyay J. Assessment of 21 Days Lockdown Effect in Some  
384 States and Overall India: A Predictive Mathematical Study on COVID-19 Outbreak.  
385 2020;1–36. Available from: <http://arxiv.org/abs/2004.03487>
- 386 41. Downtoearth.org. COVID-19: Do Indians have higher immunity to novel coronavirus  
387 [Internet]. 2020 [cited 2020 Apr 27]. Available from:  
388 [https://www.downtoearth.org.in/news/health/covid-19-do-indians-have-higher-immunity-](https://www.downtoearth.org.in/news/health/covid-19-do-indians-have-higher-immunity-to-novel-coronavirus-70322)  
389 [to-novel-coronavirus-70322](https://www.downtoearth.org.in/news/health/covid-19-do-indians-have-higher-immunity-to-novel-coronavirus-70322)
- 390 42. Raja R. More immunity genes in Indians. Nat India [Internet]. 2008 Aug 1 [cited 2020  
391 Apr 27]; Available from:  
392 <http://www.natureasia.com/en/nindia/article/10.1038/nindia.2008.254>
- 393
